# Supplementary material for: The effects of droplet stabilization by surfactants and nanoparticles on leakage, cross-talk, droplet stability, and cell adhesion
Source: Royal Society of Chemistry journal article supplement (doi:10.1039/d4ra04298k), 2024-01-01
Supplement: d4ra04298k1.pdf [file d4ra04298k1.pdf]

# ESI: The effects of droplet stabilization by surfactants and nanoparticles on leakage, cross-talk, droplet stability, and cell adhesion

Jorik Waeterschoot,<sup>†</sup> Emine Kayahan,<sup>†</sup> Jolien Breukers,<sup>‡</sup> Jeroen Lammertyn,<sup>‡</sup>  
and Xavier Casadevall i Solvas<sup>\*,†</sup>

<sup>†</sup>*Biomimetics Group, Division of Mechatronics, Biostatistics and Sensors (MeBios),  
Department of Biosystems, KU Leuven, Willem de Croylaan 42, 3001 Leuven, Belgium.*

<sup>‡</sup>*Biosensors Group, Division of Mechatronics, Biostatistics and Sensors (MeBios),  
Department of Biosystems, KU Leuven, Willem de Croylaan 42, 3001 Heverlee, Belgium.*

E-mail: xevi.casadevall@kuleuven.be

Phone: +32 16 37 71 03

## Supplementary material

### Protocols for SU8 master production

For 10  $\mu\text{m}$  height (flow focusing designs 1,2 and 3: 10  $\mu\text{m}$  versions) SU8 2015 was spincoated for 10 s at 500 rpm (100 rpm/s), followed by 37 s at 4000 rpm (500 rpm/s). Next a soft baking step of 3 min at 95 °C was performed and the resulting layer was exposed through the photoplot for 140 mJ/cm<sup>2</sup>. Next the wafer was baked for 4 min at 95 °C and developed with PGMEA for 3 min. For 15  $\mu\text{m}$  height (step emulsification 1 design). SU8 2015 was spincoated for 10 s at 500 rpm (100 rpm/s), followed by 35 s at 3000 rpm (500 rpm/s). All other processing steps were similar to the 10  $\mu\text{m}$  height SU8 layer. For 20  $\mu\text{m}$  chips

(flow focusing designs 1,2 and 3: 20  $\mu\text{m}$  versions and T-junction this process was slightly adapted. Spincoating: 10 s at 500 rpm (100 rpm/s) and 33 s 2000 rpm (500 rpm/s), soft bake: 3.5 min at 95  $^{\circ}\text{C}$ , exposure 150  $\text{mJ}/\text{cm}^2$ , post exposure bake: 4.5 min at 95  $^{\circ}\text{C}$ , 3.5 min development. For 30  $\mu\text{m}$  chips (flow focusing designs 1: 30  $\mu\text{m}$  version) Spincoating: 10 s at 500 rpm (100 rpm/s) and 33 s 1250 rpm (250 rpm/s), soft bake: 4.5 min at 95  $^{\circ}\text{C}$ , exposure 160  $\text{mJ}/\text{cm}^2$ , post exposure bake: 5.5 min at 95  $^{\circ}\text{C}$ , 4.5 min development. For an 70  $\mu\text{m}$  layer (cell encapsulation experiments, SU8 2075) Spincoating: 10 s at 500 rpm (100 rpm/s) and 30 s 3500 rpm (500 rpm/s), soft bake: 3 min at 65  $^{\circ}\text{C}$  and 9 min at 95  $^{\circ}\text{C}$ , exposure 200  $\text{mJ}/\text{cm}^2$ , post exposure bake: 2 min at 65  $^{\circ}\text{C}$  and 7 min at 95  $^{\circ}\text{C}$ , 7 min development. For an 100  $\mu\text{m}$  layer (second layer step emulsification designs, SU8 2075) Spincoating: 10 s at 500 rpm (100 rpm/s) and 33 s 2000 rpm (500 rpm/s), soft bake: 5 min at 65  $^{\circ}\text{C}$  and 15 min at 95  $^{\circ}\text{C}$ , exposure 230  $\text{mJ}/\text{cm}^2$ , post exposure bake: 5 min at 65  $^{\circ}\text{C}$  and 9 min at 95  $^{\circ}\text{C}$ , 9 min development. For a 2  $\mu\text{m}$  layer (step-emulsification design 2 and combination of step-emulsification and flow focusing designs, first layer, SU8 2002) Spincoating: 10 s at 500 rpm (100 rpm/s) and 40 s 3000 rpm (250 rpm/s), soft bake: 1 min at 95  $^{\circ}\text{C}$ , exposure 80  $\text{mJ}/\text{cm}^2$ , post exposure bake: 1.5 min at 95  $^{\circ}\text{C}$ , 1 min development. All masters were finally baked for 10 min at 120  $^{\circ}\text{C}$ .

Table S1:  $p$ -values of one-sided t-test comparing fluorescence intensity values for different dyes in the partitioned in the oil phase containing different surfactants.

| Dye      | RAN       | Krytox    | FNP       |
|----------|-----------|-----------|-----------|
| Rhod6G   | 1,465E-03 | 1,803E-12 | 5,544E-09 |
| NR       | 1,128E-01 | 6,359E-01 | 1,000E+00 |
| Rhod101  | 5,708E-01 | 2,479E-04 | 4,100E-07 |
| RhodB    | 9,703E-01 | 3,243E-04 | 5,484E-07 |
| EMA      | 9,872E-01 | 1,463E-06 | 6,554E-02 |
| Cy7      | 2,738E-01 | 9,543E-04 | 3,683E-01 |
| Res      | 9,610E-02 | 3,237E-03 | 1,972E-07 |
| AZ       | 9,230E-01 | 6,506E-03 | 4,641E-01 |
| Sulfrhod | 9,288E-01 | 9,438E-06 | 4,562E-03 |
| Fl       | 9,716E-01 | 2,782E-03 | 9,723E-01 |
| Cy5      | 3,369E-01 | 7,624E-10 | 4,331E-01 |
| DAPI     | 3,902E-01 | 7,419E-06 | 1,053E-05 |
| AF350    | 3,055E-01 | 7,493E-06 | 2,651E-06 |
| Pyr      | 7,723E-01 | 8,943E-04 | 9,970E-01 |
| AF488    | 9,673E-01 | 1,904E-02 | 9,973E-01 |
| AF568    | 2,434E-01 | 4,703E-05 | 9,437E-01 |

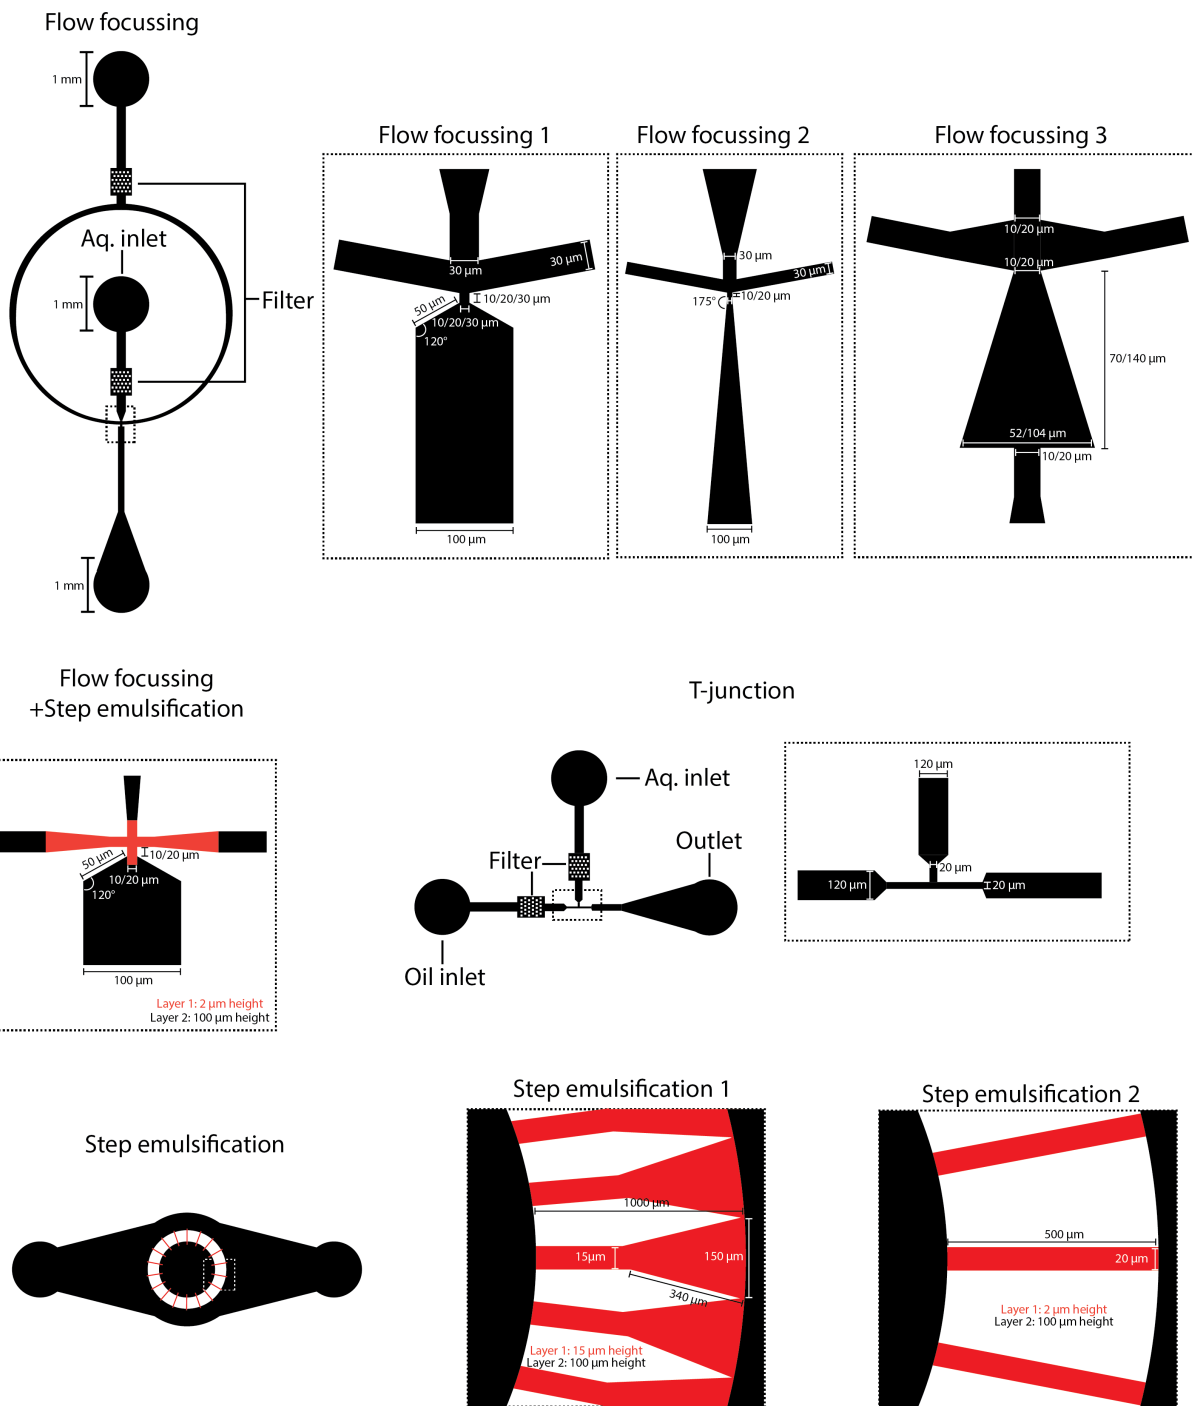

Figure S1: Different chip designs with key dimensions utilised in this paper.



Nile red (NR)

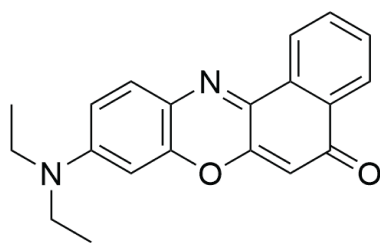

Resorufin (Re)

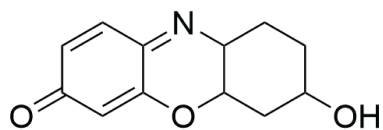

Rhodamine B (RhodB)

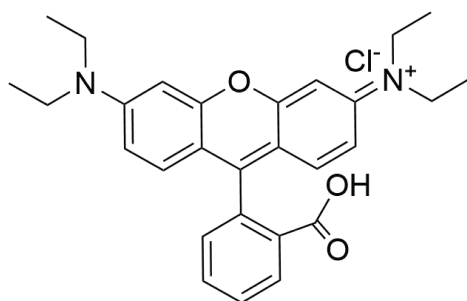

Rhodamine 6G (Rhod6G)

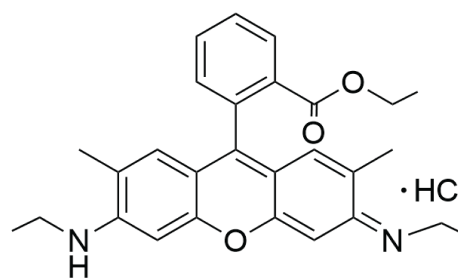

Rhodamine 101 (Rhod101)

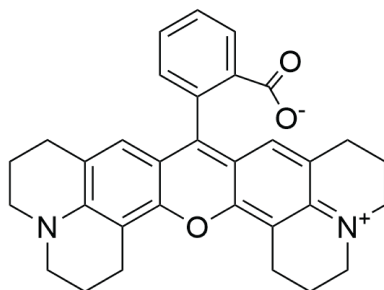

Sulfo-Cy5 NHS ester (Cy5)

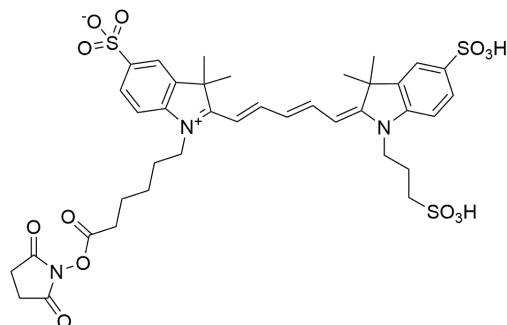

Sulfo-Cyanine7 NHS ester (Cy7)

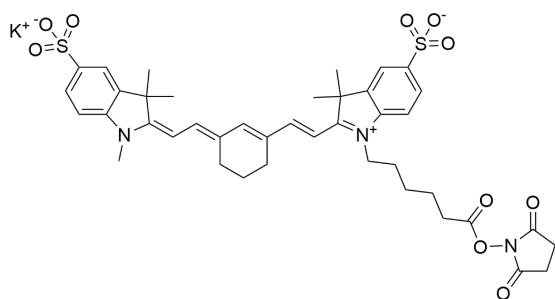

Sulforhodamine 101 (Sulforhod)

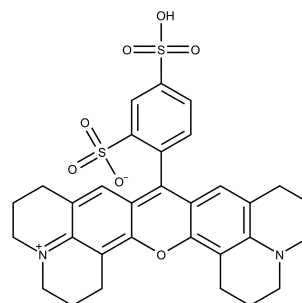

Figure S2: Chemical structure of the different dyes utilised for leakage experiments.

8-hydroxypyrene-1,3,6-trisulfonic acid  
trisodium salt (Pyr)

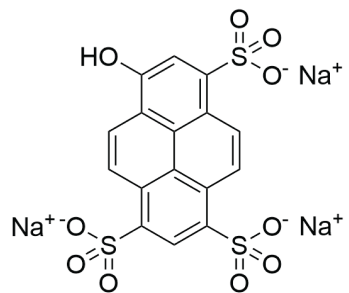

Alexa Fluor 350 (A350)

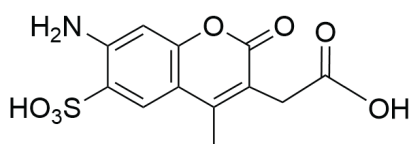

Alizarin red (AZ)

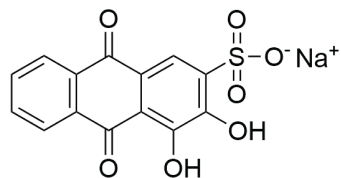

Eosin-5-Maleimide (EMA)

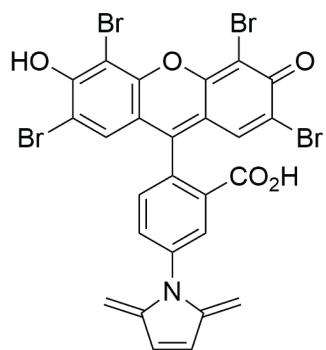

Alexa Fluor 488 (A488)

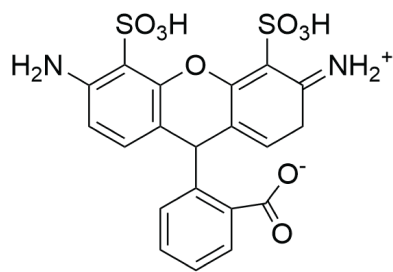

Alexa Fluor 568 (A568)

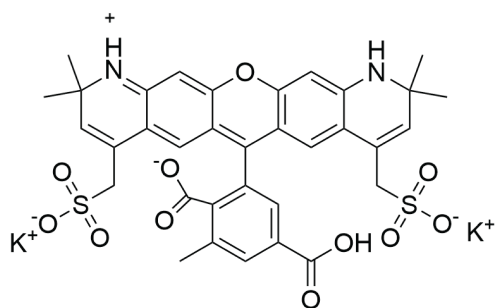

Diamidino-2-Phenylindole  
Dihydrochloride (DAPI)

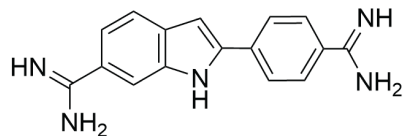

Fluorescein sodium salt (FI)

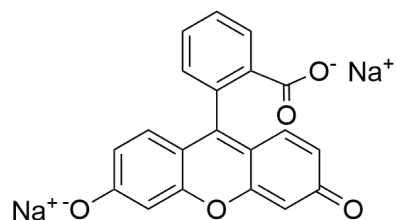

Figure S3: Chemical structure of the different dyes utilised for leakage experiments.

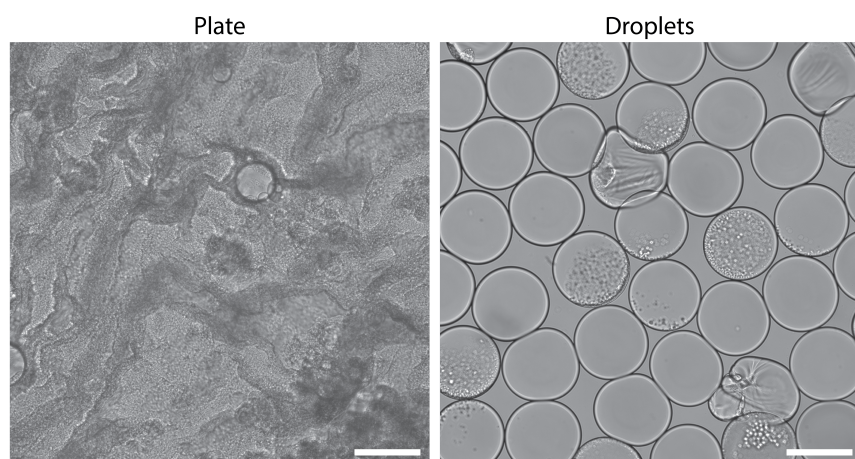

Figure S4: Cell adhesion of (MCF-7 cells) in a microwellplate plate containing a HFE 7500 layer with Krytox and in Krytox stabilised droplets. Krytox surfactant reacts with cell medium (scale bar 100  $\mu\text{m}$ ).

Table S2: Data calculated for the determination of the leakage categories for samples made with PBS.

| Dye      | Stabiliser | Day  | mu1  | mu2   | sigma1 | sigma2 | p1    | p2    | R <sup>2</sup> _bi | %dark | %overlap |
|----------|------------|------|------|-------|--------|--------|-------|-------|--------------------|-------|----------|
| Rhod6G   | RAN        | day0 | 15.2 | 45.8  | 5.8    | 24.2   | 0.990 | 0.010 | 0.949              | 95.9  | 20.6     |
| Rhod6G   | RAN        | day1 | 2.0  | 28.5  | 0.7    | 31.0   | 0.973 | 0.027 | 0.992              |       | 2.8      |
| Rhod6G   | Krytox     | day0 | 47.0 | 85.3  | 20.1   | 7.6    | 0.591 | 0.409 | 0.496              | 100.0 | 14.2     |
| Rhod6G   | Krytox     | day0 | 26.1 | 61.9  | 13.5   | 8.5    | 0.388 | 0.612 | 0.785              |       | 10.1     |
| Rhod6G   | NP         | day0 | 28.2 | 63.6  | 13.0   | 17.7   | 0.805 | 0.195 | 0.778              | 100.0 | 24.5     |
| Rhod6G   | NP         | day1 | 31.1 | 100.0 | 9.6    | 0.3    | 0.999 | 0.001 | 0.889              |       | 0.0      |
| NR       | RAN        | day0 | 13.4 | 37.8  | 6.2    | 18.3   | 0.712 | 0.288 | 0.936              | 83.7  | 24.6     |
| NR       | RAN        | day1 | 16.5 | 35.1  | 5.0    | 18.0   | 0.966 | 0.034 | 0.974              |       | 29.6     |
| NR       | Krytox     | day0 | 72.1 | 86.3  | 14.1   | 4.6    | 0.418 | 0.582 | 0.809              | 100.0 | 34.0     |
| NR       | Krytox     | day1 | 44.4 | 86.5  | 22.3   | 6.0    | 0.687 | 0.313 | 0.463              |       | 10.4     |
| NR       | NP         | day0 | 62.6 | 84.3  | 17.6   | 6.8    | 0.470 | 0.530 | 0.688              | 100.0 | 30.7     |
| NR       | NP         | day1 | 50.9 | 83.9  | 19.1   | 7.9    | 0.621 | 0.379 | 0.589              |       | 19.3     |
| Rhod101  | RAN        | day0 | 9.4  | 76.8  | 5.4    | 11.3   | 0.837 | 0.163 | 0.913              | 0.0   | 0.0      |
| Rhod101  | RAN        | day1 | 23.5 | 64.6  | 9.3    | 12.1   | 0.755 | 0.245 | 0.802              |       | 5.4      |
| Rhod101  | Krytox     | day0 | 59.1 | 85.4  | 18.1   | 8.6    | 0.641 | 0.359 | 0.725              | 100.0 | 28.6     |
| Rhod101  | Krytox     | day1 | 38.8 | 69.5  | 14.2   | 9.9    | 0.423 | 0.577 | 0.847              |       | 19.7     |
| Rhod101  | NP         | day0 | 32.7 | 50.2  | 18.3   | 19.6   | 0.150 | 0.850 | 0.540              | 100.0 | 63.7     |
| Rhod101  | NP         | day1 | 30.7 | 62.2  | 13.7   | 12.2   | 0.609 | 0.391 | 0.633              |       | 22.3     |
| RhodB    | RAN        | day0 | 25.6 | 62.4  | 9.2    | 9.3    | 0.842 | 0.158 | 0.862              | 0.0   | 8.9      |
| RhodB    | RAN        | day1 | 40.2 | 66.3  | 18.5   | 6.8    | 0.473 | 0.527 | 0.826              |       | 25.5     |
| RhodB    | Krytox     | day0 | 47.7 | 49.0  | 3.1    | 22.3   | 0.186 | 0.814 | 0.794              | 99.8  | 26.0     |
| RhodB    | Krytox     | day1 | 22.0 | 72.3  | 15.0   | 11.5   | 0.412 | 0.588 | 0.483              |       | 5.7      |
| RhodB    | NP         | day0 | 13.0 | 54.5  | 5.1    | 15.0   | 0.193 | 0.807 | 0.671              | 100.0 | 3.3      |
| RhodB    | NP         | day1 | 31.8 | 51.3  | 13.4   | 19.0   | 0.818 | 0.182 | 0.813              |       | 52.8     |
| EMA      | RAN        | day0 | 1.5  | 54.3  | 0.5    | 32.2   | 0.640 | 0.360 | 0.989              | 1.0   | 0.0      |
| EMA      | RAN        | day1 | 0.7  | 59.5  | 0.4    | 10.3   | 0.698 | 0.302 | 0.964              |       | 0.0      |
| EMA      | Krytox     | day0 | 1.5  | 67.1  | 0.7    | 14.6   | 0.576 | 0.424 | 0.986              | 0.3   | 0.0      |
| EMA      | Krytox     | day1 | 1.4  | 61.6  | 0.6    | 10.6   | 0.595 | 0.405 | 0.995              |       | 0.0      |
| EMA      | NP         | day0 | 1.9  | 78.5  | 0.7    | 12.6   | 0.686 | 0.314 | 0.967              | 6.6   | 0.0      |
| EMA      | NP         | day1 | 2.4  | 60.3  | 0.8    | 12.0   | 0.635 | 0.365 | 0.884              |       | 0.0      |
| Cy7      | RAN        | day0 | 8.7  | 54.9  | 3.1    | 20.2   | 0.469 | 0.531 | 0.871              | 0.0   | 3.0      |
| Cy7      | RAN        | day1 | 8.2  | 64.6  | 2.9    | 21.8   | 0.765 | 0.235 | 0.861              |       | 1.4      |
| Cy7      | Krytox     | day0 | 6.0  | 65.8  | 2.5    | 20.2   | 0.266 | 0.734 | 0.540              | 5.7   | 0.6      |
| Cy7      | Krytox     | day1 | 9.5  | 64.5  | 18.5   | 18.7   | 0.410 | 0.590 | 0.860              |       | 0.6      |
| Cy7      | NP         | day0 | 7.1  | 55.0  | 3.0    | 21.0   | 0.736 | 0.264 | 0.873              | 0.0   | 2.8      |
| Cy7      | NP         | day1 | 7.0  | 47.7  | 2.5    | 20.8   | 0.535 | 0.465 | 0.840              |       | 4.3      |
| Res      | RAN        | day0 | 1.4  | 48.7  | 1.5    | 15.5   | 0.659 | 0.341 | 0.995              | 0.0   | 0.1      |
| Res      | RAN        | day1 | 4.2  | 22.3  | 3.0    | 15.1   | 0.548 | 0.452 | 0.744              |       | 15.4     |
| Res      | Krytox     | day0 | 9.2  | 40.9  | 3.7    | 11.2   | 0.411 | 0.589 | 0.839              | 0.0   | 2.9      |
| Res      | Krytox     | day1 | 8.5  | 23.3  | 3.3    | 12.4   | 0.904 | 0.096 | 0.992              |       | 23.7     |
| Res      | NP         | day0 | 1.5  | 52.0  | 0.6    | 9.4    | 0.296 | 0.704 | 0.889              | 0.3   | 0.0      |
| Res      | NP         | day1 | 6.1  | 88.5  | 11.8   | 8.8    | 0.635 | 0.365 | 0.423              |       | 0.0      |
| AZ       | RAN        | day0 | 4.5  | 58.6  | 1.7    | 14.6   | 0.398 | 0.602 | 0.868              | 5.0   | 0.1      |
| AZ       | RAN        | day1 | 7.9  | 52.9  | 2.5    | 26.9   | 0.721 | 0.279 | 0.934              |       | 5.4      |
| AZ       | Krytox     | day0 | 4.2  | 66.0  | 1.6    | 9.2    | 0.469 | 0.531 | 0.969              | 0.0   | 0.0      |
| AZ       | Krytox     | day1 | 12.6 | 66.9  | 4.6    | 8.7    | 0.466 | 0.534 | 0.880              |       | 0.0      |
| AZ       | NP         | day0 | 2.8  | 32.4  | 2.0    | 26.0   | 0.778 | 0.222 | 0.672              | 1.4   | 6.4      |
| AZ       | NP         | day1 | 5.7  | 31.3  | 4.9    | 21.8   | 0.893 | 0.107 | 0.530              |       | 17.2     |
| SulfRhod | RAN        | day0 | 1.5  | 59.9  | 0.6    | 11.8   | 0.518 | 0.482 | 0.981              | 0.0   | 0.0      |
| SulfRhod | RAN        | day1 | 0.6  | 47.0  | 0.4    | 10.1   | 0.726 | 0.274 | 0.995              |       | 0.0      |
| SulfRhod | Krytox     | day0 | 1.6  | 73.3  | 0.8    | 14.0   | 0.848 | 0.152 | 0.990              | 0.4   | 0.0      |
| SulfRhod | Krytox     | day1 | 12.7 | 69.2  | 5.8    | 15.3   | 0.911 | 0.089 | 0.926              |       | 0.7      |
| SulfRhod | NP         | day0 | 1.3  | 79.8  | 0.6    | 12.3   | 0.626 | 0.374 | 0.972              | 2.5   | 0.0      |
| SulfRhod | NP         | day1 | 1.3  | 74.9  | 0.6    | 11.5   | 0.702 | 0.298 | 0.981              |       | 0.0      |
| Fl       | RAN        | day0 | 1.1  | 62.3  | 0.8    | 16.1   | 0.559 | 0.441 | 0.890              | 0.5   | 0.0      |
| Fl       | RAN        | day1 | 1.1  | 65.0  | 0.7    | 20.6   | 0.594 | 0.406 | 0.981              |       | 0.1      |
| Fl       | Krytox     | day0 | 1.6  | 48.3  | 0.6    | 8.8    | 0.436 | 0.564 | 0.994              | 0.0   | 0.0      |
| Fl       | Krytox     | day1 | 33.4 | 48.7  | 17.1   | 16.0   | 0.110 | 0.890 | 0.856              |       | 64.1     |
| Fl       | NP         | day0 | 1.2  | 51.4  | 0.7    | 9.3    | 0.491 | 0.509 | 0.988              | 2.6   | 0.0      |
| Fl       | NP         | day1 | 0.9  | 75.4  | 0.6    | 12.0   | 0.800 | 0.200 | 0.985              |       | 0.0      |
| Cy5      | RAN        | day0 | 0.5  | 73.9  | 0.4    | 16.7   | 0.755 | 0.245 | 0.997              | 0.0   | 0.0      |
| Cy5      | RAN        | day1 | 1.0  | 51.9  | 0.5    | 10.6   | 0.522 | 0.478 | 0.932              |       | 0.0      |
| Cy5      | Krytox     | day0 | 1.4  | 68.8  | 0.4    | 8.9    | 0.819 | 0.181 | 0.991              | 0.1   | 0.0      |
| Cy5      | Krytox     | day1 | 0.4  | 55.2  | 0.3    | 8.3    | 0.781 | 0.219 | 0.984              |       | 0.0      |
| Cy5      | NP         | day0 | 0.9  | 77.8  | 0.5    | 20.9   | 0.774 | 0.226 | 0.990              | 11.2  | 0.0      |
| Cy5      | NP         | day1 | 1.0  | 64.0  | 0.5    | 22.5   | 0.698 | 0.302 | 0.985              |       | 0.1      |
| DAPI     | RAN        | day0 | 13.4 | 59.7  | 5.3    | 11.6   | 0.242 | 0.758 | 0.788              | 0.3   | 0.6      |
| DAPI     | RAN        | day1 | 55.1 | 68.8  | 8.0    | 18.3   | 0.575 | 0.425 | 0.834              |       | 49.3     |
| DAPI     | Krytox     | day0 | 55.4 | 79.2  | 19.7   | 10.7   | 0.355 | 0.645 | 0.722              | 100.0 | 39.2     |
| DAPI     | Krytox     | day1 | 51.8 | 68.8  | 17.3   | 13.0   | 0.381 | 0.619 | 0.855              |       | 56.0     |
| DAPI     | NP         | day0 | 49.8 | 71.0  | 19.6   | 12.3   | 0.236 | 0.764 | 0.664              | 100.0 | 47.7     |
| DAPI     | NP         | day1 | 43.4 | 81.2  | 17.2   | 8.9    | 0.851 | 0.149 | 0.635              |       | 13.8     |
| AF350    | RAN        | day0 | 6.8  | 70.9  | 3.7    | 15.6   | 0.318 | 0.682 | 0.740              | 10.0  | 0.1      |
| AF350    | RAN        | day1 | 3.8  | 49.6  | 0.9    | 18.1   | 0.720 | 0.280 | 0.951              |       | 0.6      |
| AF350    | Krytox     | day0 | 5.5  | 66.2  | 1.8    | 15.7   | 0.424 | 0.576 | 0.909              | 3.8   | 0.0      |
| AF350    | Krytox     | day1 | 4.9  | 54.1  | 0.9    | 15.5   | 0.673 | 0.327 | 0.960              |       | 0.1      |
| AF350    | NP         | day0 | 7.3  | 41.9  | 2.5    | 16.6   | 0.619 | 0.381 | 0.952              | 0.0   | 4.3      |
| AF350    | NP         | day1 | 5.4  | 45.2  | 1.4    | 18.2   | 0.693 | 0.307 | 0.937              |       | 1.9      |
| Pyr      | RAN        | day0 | 12.5 | 38.9  | 7.9    | 18.4   | 0.928 | 0.072 | 0.222              | 0.4   | 26.3     |
| Pyr      | RAN        | day1 | 0.9  | 25.0  | 0.5    | 13.8   | 0.591 | 0.409 | 0.973              |       | 0.9      |
| Pyr      | Krytox     | day0 | 28.0 | 40.3  | 23.7   | 8.3    | 0.590 | 0.410 | 0.212              | 0.0   | 47.8     |
| Pyr      | Krytox     | day1 | 20.9 | 66.0  | 7.4    | 10.7   | 0.448 | 0.552 | 0.805              |       | 1.2      |
| Pyr      | NP         | day0 | 13.9 | 62.3  | 11.0   | 20.2   | 0.950 | 0.050 | 0.129              | 5.0   | 11.4     |
| Pyr      | NP         | day1 | 10.1 | 59.9  | 10.9   | 24.1   | 0.954 | 0.046 | 0.077              |       | 13.3     |
| AF488    | RAN        | day0 | 0.5  | 29.8  | 0.5    | 18.0   | 0.544 | 0.456 | 0.966              | 0.0   | 0.8      |
| AF488    | RAN        | day1 | 0.8  | 65.1  | 0.5    | 17.2   | 0.682 | 0.318 | 0.995              |       | 0.0      |
| AF488    | Krytox     | day0 | 0.6  | 56.4  | 0.5    | 17.1   | 0.875 | 0.125 | 0.999              | 2.4   | 0.0      |
| AF488    | Krytox     | day1 | 0.5  | 52.3  | 0.4    | 14.5   | 0.787 | 0.213 | 0.991              |       | 0.0      |
| AF488    | NP         | day0 | 0.5  | 59.8  | 0.5    | 26.7   | 0.773 | 0.227 | 0.992              | 0.0   | 0.2      |
| AF488    | NP         | day1 | 0.8  | 52.7  | 0.5    | 16.4   | 0.830 | 0.170 | 0.994              |       | 0.0      |
| AF568    | RAN        | day0 | 0.7  | 67.5  | 0.5    | 15.9   | 0.704 | 0.296 | 0.997              | 0.2   | 0.0      |
| AF568    | RAN        | day1 | 1.0  | 55.9  | 0.5    | 16.5   | 0.541 | 0.459 | 0.978              |       | 0.0      |
| AF568    | Krytox     | day0 | 0.7  | 67.7  | 0.4    | 10.6   | 0.617 | 0.383 | 0.997              | 1.8   | 0.0      |
| AF568    | Krytox     | day1 | 0.8  | 64.2  | 0.4    | 11.6   | 0.578 | 0.422 | 0.991              |       | 0.0      |
| AF568    | NP         | day0 | 0.9  | 52.0  | 0.4    | 27.7   | 0.708 | 0.292 | 0.996              | 1.8   | 0.4      |
| AF568    | NP         | day1 | 0.5  | 43.5  | 0.4    | 25.5   | 0.806 | 0.194 | 0.996              |       | 0.3      |

Table S3: Data calculated for the determination of the leakage categories for samples made with DMEM buffer.

| Dye      | Stabiliser | Day  | mu1  | mu2  | sigma1 | sigma2 | p1    | p2    | R <sup>2</sup> _bi | %dark | %overlap <sub>p</sub> |
|----------|------------|------|------|------|--------|--------|-------|-------|--------------------|-------|-----------------------|
| Rhod6G   | RAN        | day0 | 6.6  | 63.6 | 2.6    | 15.7   | 0.161 | 0.839 | 0.751              | 100.0 | 0.1                   |
| Rhod6G   | RAN        | day1 | 45.0 | 76.0 | 22.0   | 12.7   | 0.507 | 0.493 | 0.413              | 94.3  | 34.3                  |
| Rhod6G   | Krytox     | day0 | 36.8 | 85.5 | 16.8   | 8.2    | 0.954 | 0.046 | 0.515              | 100.0 | 4.7                   |
| Rhod6G   | Krytox     | day1 | 35.1 | 74.8 | 17.4   | 10.2   | 0.351 | 0.649 | 0.595              | 100.0 | 14.4                  |
| Rhod6G   | NP         | day0 | 35.0 | 63.8 | 15.6   | 13.7   | 0.328 | 0.672 | 0.689              | 100.0 | 32.5                  |
| Rhod6G   | NP         | day1 | 60.0 | 88.8 | 14.7   | 5.9    | 0.859 | 0.141 | 0.753              | 100.0 | 14.1                  |
| NR       | RAN        | day0 | 0.4  | 17.1 | 0.5    | 19.6   | 0.832 | 0.168 | 0.994              | 0.6   | 1.2                   |
| NR       | RAN        | day1 | 0.5  | 17.1 | 0.4    | 19.8   | 0.775 | 0.225 | 0.996              | 0.6   | 1.2                   |
| NR       | Krytox     | day0 | 1.5  | 34.2 | 1.1    | 30.6   | 0.885 | 0.115 | 0.820              | 53.6  | 3.1                   |
| NR       | Krytox     | day1 | 1.2  | 30.2 | 0.6    | 30.7   | 0.891 | 0.109 | 0.996              | 0.6   | 2.0                   |
| NR       | NP         | day0 | 3.0  | 18.4 | 1.2    | 17.1   | 0.959 | 0.041 | 0.995              | 88.5  | 8.4                   |
| NR       | NP         | day1 | 1.5  | 15.5 | 0.7    | 15.4   | 0.886 | 0.114 | 0.985              | 0.6   | 4.5                   |
| Rhod101  | RAN        | day0 | 1.9  | 38.4 | 1.2    | 27.2   | 0.925 | 0.075 | 0.848              | 0.0   | 3.0                   |
| Rhod101  | RAN        | day1 | 7.0  | 39.2 | 3.1    | 21.8   | 0.692 | 0.308 | 0.951              | 0.0   | 9.6                   |
| Rhod101  | Krytox     | day0 | 10.2 | 45.4 | 4.9    | 21.2   | 0.496 | 0.504 | 0.849              | 100.0 | 12.0                  |
| Rhod101  | Krytox     | day1 | 41.0 | 71.7 | 15.0   | 9.4    | 0.854 | 0.146 | 0.746              | 100.0 | 20.0                  |
| Rhod101  | NP         | day0 | 43.5 | 52.8 | 17.1   | 17.5   | 0.624 | 0.376 | 0.680              | 100.0 | 78.5                  |
| Rhod101  | NP         | day1 | 39.1 | 71.1 | 13.4   | 12.2   | 0.692 | 0.308 | 0.729              | 100.0 | 21.0                  |
| RhodB    | RAN        | day0 | 32.1 | 43.7 | 12.9   | 4.3    | 0.359 | 0.641 | 0.943              | 0.0   | 37.5                  |
| RhodB    | RAN        | day1 | 48.7 | 78.4 | 18.9   | 7.9    | 0.501 | 0.499 | 0.721              | 100.0 | 23.5                  |
| RhodB    | Krytox     | day0 | 19.6 | 64.0 | 10.1   | 17.2   | 0.468 | 0.532 | 0.398              | 100.0 | 10.0                  |
| RhodB    | Krytox     | day1 | 54.1 | 85.3 | 17.2   | 6.3    | 0.876 | 0.124 | 0.821              | 100.0 | 15.7                  |
| RhodB    | NP         | day0 | 17.9 | 47.7 | 7.5    | 17.2   | 0.580 | 0.420 | 0.775              | 100.0 | 20.2                  |
| RhodB    | NP         | day1 | 44.4 | 77.5 | 15.4   | 9.8    | 0.663 | 0.337 | 0.665              | 100.0 | 18.3                  |
| EMA      | RAN        | day0 | 0.6  | 54.6 | 0.4    | 22.1   | 0.605 | 0.395 | 0.997              | 0.4   | 0.1                   |
| EMA      | RAN        | day1 | 1.0  | 65.0 | 0.5    | 19.5   | 0.725 | 0.275 | 0.995              | 0.4   | 0.0                   |
| EMA      | Krytox     | day0 | 2.2  | 52.5 | 0.8    | 24.7   | 0.450 | 0.550 | 0.966              | 0.4   | 0.9                   |
| EMA      | Krytox     | day1 | 0.7  | 48.8 | 0.5    | 24.8   | 0.741 | 0.259 | 0.990              | 0.4   | 0.4                   |
| EMA      | NP         | day0 | 0.4  | 47.1 | 0.4    | 31.3   | 0.882 | 0.118 | 0.999              | 8.5   | 0.3                   |
| EMA      | NP         | day1 | 2.2  | 51.6 | 1.0    | 15.8   | 0.198 | 0.802 | 0.821              | 0.6   | 2.6                   |
| Cy7      | RAN        | day0 | 11.2 | 51.4 | 2.4    | 20.8   | 0.691 | 0.309 | 0.975              | 1.0   | 4.6                   |
| Cy7      | RAN        | day1 | 9.2  | 48.9 | 3.3    | 25.2   | 0.679 | 0.321 | 0.968              | 8.3   | 8.3                   |
| Cy7      | Krytox     | day0 | 9.1  | 56.6 | 4.3    | 25.3   | 0.699 | 0.301 | 0.864              | 1.9   | 6.6                   |
| Cy7      | Krytox     | day1 | 9.4  | 61.0 | 3.2    | 23.0   | 0.568 | 0.432 | 0.907              | 3.0   | 3.0                   |
| Cy7      | NP         | day0 | 5.2  | 40.0 | 2.0    | 16.0   | 0.235 | 0.765 | 0.871              | 5.4   | 2.9                   |
| Cy7      | NP         | day1 | 5.5  | 48.8 | 2.3    | 19.6   | 0.361 | 0.639 | 0.857              | 2.6   | 2.6                   |
| Res      | RAN        | day0 | 0.5  | 42.5 | 0.5    | 18.8   | 0.817 | 0.183 | 0.993              | 5.4   | 0.3                   |
| Res      | RAN        | day1 | 5.7  | 60.9 | 4.4    | 11.5   | 0.555 | 0.445 | 0.660              | 0.0   | 0.0                   |
| Res      | Krytox     | day0 | 1.6  | 60.9 | 0.9    | 12.4   | 0.148 | 0.852 | 0.854              | 0.3   | 0.0                   |
| Res      | Krytox     | day1 | 2.6  | 59.5 | 2.2    | 20.8   | 0.712 | 0.288 | 0.680              | 0.0   | 0.7                   |
| Res      | NP         | day0 | 1.6  | 67.4 | 0.7    | 8.6    | 0.401 | 0.599 | 0.962              | 0.5   | 0.0                   |
| Res      | NP         | day1 | 10.7 | 65.3 | 5.7    | 11.4   | 0.743 | 0.257 | 0.907              | 0.1   | 0.1                   |
| AZ       | RAN        | day0 | 0.3  | 14.4 | 0.3    | 14.3   | 0.568 | 0.432 | 0.982              | 0.3   | 0.5                   |
| AZ       | RAN        | day1 | 1.0  | 15.2 | 0.8    | 13.7   | 0.677 | 0.323 | 0.782              | 0.3   | 4.5                   |
| AZ       | Krytox     | day0 | 1.0  | 23.9 | 0.5    | 23.2   | 0.693 | 0.307 | 0.986              | 7.0   | 1.7                   |
| AZ       | Krytox     | day1 | 1.0  | 18.1 | 0.7    | 20.5   | 0.738 | 0.262 | 0.904              | 3.0   | 3.0                   |
| AZ       | NP         | day0 | 4.2  | 31.0 | 1.8    | 8.8    | 0.352 | 0.648 | 0.866              | 3.8   | 0.9                   |
| AZ       | NP         | day1 | 24.2 | 41.3 | 18.8   | 8.2    | 0.417 | 0.583 | 0.801              | 37.1  | 37.1                  |
| SuIFRhod | RAN        | day0 | 1.8  | 65.2 | 0.9    | 20.4   | 0.670 | 0.330 | 0.927              | 0.0   | 0.1                   |
| SuIFRhod | RAN        | day1 | 1.0  | 62.1 | 0.7    | 29.6   | 0.747 | 0.253 | 0.921              | 0.0   | 0.5                   |
| SuIFRhod | Krytox     | day0 | 16.8 | 50.1 | 11.0   | 19.3   | 0.775 | 0.225 | 0.634              | 81.1  | 25.1                  |
| SuIFRhod | Krytox     | day1 | 26.5 | 75.8 | 9.5    | 13.1   | 0.966 | 0.034 | 0.665              | 1.9   | 2.9                   |
| SuIFRhod | NP         | day0 | 3.4  | 58.4 | 2.5    | 18.5   | 0.664 | 0.336 | 0.760              | 7.4   | 0.5                   |
| SuIFRhod | NP         | day1 | 6.1  | 54.1 | 2.2    | 15.7   | 0.748 | 0.252 | 0.938              | 0.5   | 0.5                   |
| FITC     | RAN        | day0 | 0.5  | 63.5 | 0.4    | 24.5   | 0.808 | 0.192 | 0.996              | 0.8   | 0.1                   |
| FITC     | RAN        | day1 | 1.4  | 77.0 | 0.7    | 10.6   | 0.590 | 0.410 | 0.993              | 0.0   | 0.0                   |
| FITC     | Krytox     | day0 | 1.4  | 67.7 | 0.8    | 11.1   | 0.335 | 0.665 | 0.939              | 6.5   | 0.0                   |
| FITC     | Krytox     | day1 | 1.3  | 71.0 | 0.5    | 17.9   | 0.537 | 0.463 | 0.987              | 0.0   | 0.0                   |
| FITC     | NP         | day0 | 0.7  | 76.7 | 0.6    | 17.4   | 0.576 | 0.424 | 0.965              | 5.0   | 0.0                   |
| FITC     | NP         | day1 | 1.4  | 68.8 | 1.0    | 24.7   | 0.690 | 0.310 | 0.935              | 0.2   | 0.2                   |
| Cy5      | RAN        | day0 | 0.3  | 27.9 | 0.4    | 17.9   | 0.645 | 0.355 | 0.995              | 1.4   | 0.4                   |
| Cy5      | RAN        | day1 | 0.7  | 57.1 | 0.4    | 27.4   | 0.636 | 0.364 | 0.996              | 0.2   | 0.2                   |
| Cy5      | Krytox     | day0 | 0.9  | 60.0 | 0.5    | 25.5   | 0.632 | 0.368 | 0.992              | 0.5   | 0.2                   |
| Cy5      | Krytox     | day1 | 0.7  | 54.6 | 0.4    | 28.2   | 0.811 | 0.189 | 0.998              | 0.3   | 0.3                   |
| Cy5      | NP         | day0 | 0.4  | 53.7 | 0.4    | 10.2   | 0.802 | 0.198 | 0.998              | 8.2   | 0.0                   |
| Cy5      | NP         | day1 | 0.7  | 53.4 | 0.5    | 11.8   | 0.663 | 0.337 | 0.996              | 0.0   | 0.0                   |
| DAPI     | RAN        | day0 | 40.2 | 74.9 | 12.1   | 8.7    | 0.802 | 0.198 | 0.785              | 4.7   | 9.4                   |
| DAPI     | RAN        | day1 | 32.3 | 61.9 | 7.7    | 11.9   | 0.613 | 0.387 | 0.869              | 12.7  | 12.7                  |
| DAPI     | Krytox     | day0 | 49.2 | 70.7 | 19.6   | 9.6    | 0.117 | 0.883 | 0.911              | 19.7  | 41.4                  |
| DAPI     | Krytox     | day1 | 18.0 | 67.3 | 11.0   | 12.3   | 0.056 | 0.944 | 0.830              | 0.0   | 3.4                   |
| DAPI     | NP         | day0 | 32.2 | 69.5 | 13.1   | 15.1   | 0.506 | 0.494 | 0.582              | 0.0   | 18.6                  |
| DAPI     | NP         | day1 | 40.1 | 63.6 | 9.9    | 19.6   | 0.541 | 0.459 | 0.706              | 0.0   | 38.9                  |
| A350     | RAN        | day0 | 6.4  | 57.6 | 1.9    | 17.2   | 0.898 | 0.102 | 0.979              | 4.1   | 0.4                   |
| A350     | RAN        | day1 | 7.2  | 64.8 | 2.5    | 22.3   | 0.765 | 0.235 | 0.924              | 1.2   | 1.2                   |
| A350     | Krytox     | day0 | 10.9 | 66.2 | 5.5    | 16.0   | 0.575 | 0.425 | 0.842              | 0.5   | 0.9                   |
| A350     | Krytox     | day1 | 8.6  | 65.4 | 2.1    | 21.8   | 0.884 | 0.116 | 0.973              | 1.0   | 1.0                   |
| A350     | NP         | day0 | 7.8  | 64.5 | 2.7    | 16.9   | 0.637 | 0.363 | 0.963              | 0.4   | 0.3                   |
| A350     | NP         | day1 | 7.8  | 64.1 | 2.5    | 17.9   | 0.447 | 0.553 | 0.876              | 0.4   | 0.4                   |
| Pyrene   | RAN        | day0 | 0.4  | 31.9 | 0.4    | 19.6   | 0.694 | 0.306 | 0.993              | 0.9   | 0.5                   |
| Pyrene   | RAN        | day1 | 0.3  | 31.1 | 0.4    | 19.2   | 0.751 | 0.249 | 0.997              | 0.4   | 0.4                   |
| Pyrene   | Krytox     | day0 | 1.0  | 61.2 | 0.6    | 18.7   | 0.667 | 0.333 | 0.965              | 2.4   | 0.0                   |
| Pyrene   | Krytox     | day1 | 1.0  | 49.5 | 0.5    | 12.5   | 0.625 | 0.375 | 0.987              | 0.0   | 0.0                   |
| Pyrene   | NP         | day0 | 2.1  | 58.7 | 1.2    | 9.7    | 0.409 | 0.591 | 0.925              | 0.3   | 0.0                   |
| Pyrene   | NP         | day1 | 18.5 | 57.3 | 26.4   | 7.7    | 0.288 | 0.712 | 0.520              | 20.0  | 20.0                  |
| A488     | RAN        | day0 | 0.7  | 44.6 | 0.5    | 31.5   | 0.642 | 0.358 | 0.971              | 5.8   | 0.7                   |
| A488     | RAN        | day1 | 0.9  | 54.9 | 0.4    | 20.6   | 0.650 | 0.350 | 0.980              | 0.1   | 0.1                   |
| A488     | Krytox     | day0 | 0.5  | 29.3 | 0.4    | 28.3   | 0.910 | 0.090 | 0.998              | 10.6  | 0.7                   |
| A488     | Krytox     | day1 | 0.6  | 36.6 | 0.4    | 28.4   | 0.836 | 0.164 | 0.995              | 0.5   | 0.5                   |
| A488     | NP         | day0 | 0.6  | 33.4 | 0.6    | 17.5   | 0.521 | 0.479 | 0.881              | 1.1   | 0.8                   |
| A488     | NP         | day1 | 2.0  | 48.1 | 1.1    | 18.8   | 0.488 | 0.512 | 0.921              | 0.6   | 0.6                   |
| A568     | Krytox     | day0 | 1.3  | 75.4 | 0.5    | 11.1   | 0.410 | 0.590 | 0.990              | 1.4   | 0.0                   |
| A568     | Krytox     | day1 | 1.0  | 67.9 | 0.5    | 9.5    | 0.693 | 0.307 | 0.996              | 0.0   | 0.0                   |
| A568     | RAN        | day0 | 0.5  | 53.8 | 0.4    | 35.3   | 0.845 | 0.155 | 0.988              | 0.5   | 0.1                   |
| A568     | RAN        | day1 | 1.3  | 59.6 | 0.5    | 13.0   | 0.542 | 0.458 | 0.974              | 0.0   | 0.0                   |
| A568     | NP         | day0 | 0.7  | 69.6 | 0.4    | 11.5   | 0.755 | 0.245 | 0.995              | 1.1   | 0.0                   |
| A568     | NP         | day1 | 0.7  | 76.5 | 0.4    | 19.6   | 0.679 | 0.321 | 0.990              | 0.0   | 0.0                   |

Table S4: Data calculated for the determination of the leakage categories for samples made with Tris buffer.

| Dye     | Stabiliser | Day  | mu1  | mu2   | sigma1 | sigma2 | p1    | p2    | R <sup>2</sup> _bi | %dark | %overlap |
|---------|------------|------|------|-------|--------|--------|-------|-------|--------------------|-------|----------|
| Rhod6G  | RAN        | day0 | 46.7 | 50.4  | 17.3   | 7.1    | 0.553 | 0.447 | 0.930              | 91.4  | 58.7     |
| Rhod6G  | RAN        | day1 | 36.9 | 67.1  | 11.4   | 8.5    | 0.637 | 0.363 | 0.828              |       | 12.7     |
| Rhod6G  | Krytox     | day0 | 16.0 | 46.5  | 8.0    | 20.1   | 0.418 | 0.582 | 0.725              | 100.0 | 23.2     |
| Rhod6G  | Krytox     | day0 | 53.9 | 78.9  | 15.4   | 9.0    | 0.353 | 0.647 | 0.809              |       | 33.4     |
| Rhod6G  | NP         | day0 | 18.5 | 57.4  | 11.9   | 21.7   | 0.459 | 0.541 | 0.209              | 98.2  | 22.9     |
| Rhod6G  | NP         | day1 | 45.5 | 78.4  | 18.5   | 7.8    | 0.622 | 0.378 | 0.596              |       | 18.7     |
| NR      | RAN        | day0 | 1.3  | 15.0  | 0.9    | 16.2   | 0.749 | 0.251 | 0.892              | 44.6  | 5.3      |
| NR      | RAN        | day1 | 1.3  | 18.2  | 0.7    | 20.6   | 0.813 | 0.187 | 0.989              |       | 3.4      |
| NR      | Krytox     | day0 | 1.8  | 100.0 | 0.9    | 0.3    | 0.999 | 0.001 | 0.968              | 98.7  | 0.0      |
| NR      | Krytox     | day0 | 1.6  | 100.0 | 0.6    | 0.3    | 0.999 | 0.001 | 0.995              |       | 0.0      |
| NR      | NP         | day0 | 1.8  | 45.7  | 1.1    | 39.5   | 0.978 | 0.022 | 0.977              | 97.8  | 2.4      |
| NR      | NP         | day1 | 2.2  | 20.6  | 0.9    | 26.0   | 0.981 | 0.019 | 0.985              |       | 4.7      |
| Rhod101 | RAN        | day0 | 26.4 | 42.2  | 21.1   | 4.8    | 0.245 | 0.755 | 0.920              | 0.0   | 31.0     |
| Rhod101 | RAN        | day1 | 4.4  | 48.3  | 2.7    | 28.0   | 0.752 | 0.248 | 0.887              |       | 5.2      |
| Rhod101 | Krytox     | day0 | 18.3 | 49.6  | 7.1    | 16.8   | 0.470 | 0.530 | 0.780              | 93.2  | 16.9     |
| Rhod101 | Krytox     | day0 | 27.9 | 68.5  | 11.6   | 15.2   | 0.113 | 0.887 | 0.708              |       | 12.9     |
| Rhod101 | NP         | day0 | 44.8 | 87.4  | 14.8   | 7.1    | 0.898 | 0.102 | 0.687              | 100.0 | 4.9      |
| Rhod101 | NP         | day1 | 39.5 | 51.6  | 16.4   | 30.1   | 0.994 | 0.006 | 0.503              |       | 65.6     |
| RhodB   | RAN        | day0 | 41.5 | 55.5  | 16.7   | 8.3    | 0.684 | 0.316 | 0.868              | 0.0   | 50.5     |
| RhodB   | RAN        | day1 | 24.4 | 79.0  | 7.9    | 14.6   | 0.955 | 0.045 | 0.846              |       | 1.5      |
| RhodB   | Krytox     | day0 | 50.1 | 73.6  | 17.2   | 7.7    | 0.607 | 0.393 | 0.792              | 100.0 | 30.8     |
| RhodB   | Krytox     | day1 | 32.3 | 60.1  | 14.4   | 17.5   | 0.397 | 0.603 | 0.715              |       | 38.1     |
| RhodB   | NP         | day0 | 19.5 | 53.3  | 10.2   | 20.8   | 0.345 | 0.655 | 0.435              | 100.0 | 24.7     |
| RhodB   | NP         | day1 | 40.4 | 74.8  | 16.2   | 8.6    | 0.273 | 0.727 | 0.916              |       | 15.6     |
| EMA     | RAN        | day0 | 2.0  | 58.4  | 2.1    | 7.4    | 0.405 | 0.595 | 0.479              | 0.7   | 0.0      |
| EMA     | RAN        | day1 | 0.8  | 58.8  | 0.5    | 14.1   | 0.721 | 0.279 | 0.989              |       | 0.0      |
| EMA     | Krytox     | day0 | 3.3  | 57.2  | 2.3    | 17.3   | 0.338 | 0.662 | 0.814              | 6.4   | 0.4      |
| EMA     | Krytox     | day0 | 1.9  | 55.6  | 13.7   | 13.0   | 0.866 | 0.984 | 0.984              |       | 0.0      |
| EMA     | NP         | day0 | 0.6  | 22.9  | 0.4    | 5.4    | 0.459 | 0.541 | 0.949              | 1.9   | 0.0      |
| EMA     | NP         | day1 | 1.3  | 63.1  | 0.6    | 10.8   | 0.559 | 0.441 | 0.994              |       | 0.0      |
| EMA     | RAN        | day0 | 11.7 | 60.9  | 17.9   | 17.4   | 0.297 | 0.703 | 0.764              | 9.8   | 3.7      |
| Cy7     | RAN        | day1 | 7.0  | 51.4  | 2.4    | 18.5   | 0.423 | 0.577 | 0.906              |       | 2.0      |
| Cy7     | Krytox     | day0 | 5.5  | 40.6  | 2.4    | 19.1   | 0.357 | 0.643 | 0.769              | 8.8   | 5.2      |
| Cy7     | Krytox     | day0 | 10.6 | 48.9  | 5.8    | 17.3   | 0.781 | 0.219 | 0.829              |       | 8.0      |
| Cy7     | NP         | day0 | 5.8  | 58.1  | 2.5    | 22.0   | 0.326 | 0.674 | 0.725              | 4.8   | 1.8      |
| Cy7     | NP         | day1 | 4.2  | 48.6  | 2.0    | 19.3   | 0.718 | 0.282 | 0.943              |       | 1.8      |
| Res     | RAN        | day0 | 14.4 | 21.2  | 14.0   | 2.9    | 0.395 | 0.605 | 0.892              | 0.0   | 33.3     |
| Res     | RAN        | day1 | 2.2  | 22.6  | 1.9    | 17.2   | 0.475 | 0.525 | 0.630              |       | 8.4      |
| Res     | Krytox     | day0 | 18.9 | 26.1  | 15.3   | 3.0    | 0.349 | 0.651 | 0.904              | 0.0   | 31.9     |
| Res     | Krytox     | day1 | 10.9 | 40.0  | 3.9    | 23.5   | 0.972 | 0.028 | 0.980              |       | 15.6     |
| Res     | NP         | day0 | 2.6  | 61.4  | 1.4    | 11.2   | 0.258 | 0.742 | 0.828              | 0.5   | 0.0      |
| Res     | NP         | day1 | 1.7  | 15.3  | 1.1    | 10.4   | 0.696 | 0.304 | 0.893              |       | 7.0      |
| AZ      | RAN        | day0 | 0.9  | 15.1  | 0.6    | 8.3    | 0.431 | 0.569 | 0.952              | 0.0   | 2.4      |
| AZ      | RAN        | day1 | 0.8  | 46.2  | 0.5    | 16.9   | 0.693 | 0.307 | 0.976              |       | 0.0      |
| AZ      | Krytox     | day0 | 5.5  | 36.9  | 2.0    | 5.8    | 0.345 | 0.655 | 0.877              | 0.2   | 0.0      |
| AZ      | Krytox     | day0 | 0.9  | 65.0  | 0.5    | 9.5    | 0.693 | 0.307 | 0.985              | 0.0   | 0.0      |
| AZ      | NP         | day0 | 5.5  | 17.7  | 3.1    | 14.2   | 0.903 | 0.097 | 0.632              | 1.7   | 23.7     |
| AZ      | NP         | day1 | 0.9  | 74.5  | 0.5    | 19.7   | 0.757 | 0.243 | 0.989              |       | 0.0      |
| SuIRhod | RAN        | day0 | 1.1  | 67.4  | 0.7    | 12.0   | 0.384 | 0.616 | 0.970              | 2.4   | 0.0      |
| SuIRhod | RAN        | day1 | 0.5  | 46.7  | 0.4    | 8.6    | 0.700 | 0.300 | 0.988              |       | 0.0      |
| SuIRhod | Krytox     | day0 | 34.8 | 76.3  | 15.9   | 8.4    | 0.807 | 0.193 | 0.651              | 33.2  | 0.0      |
| SuIRhod | Krytox     | day1 | 38.5 | 49.7  | 15.5   | 6.8    | 0.659 | 0.341 | 0.908              |       | 50.4     |
| SuIRhod | NP         | day0 | 2.8  | 82.2  | 1.1    | 9.3    | 0.265 | 0.735 | 0.937              | 1.1   | 0.0      |
| SuIRhod | NP         | day1 | 1.9  | 73.5  | 0.8    | 11.7   | 0.560 | 0.440 | 0.983              |       | 0.0      |
| Fl      | RAN        | day0 | 0.8  | 67.4  | 0.4    | 15.2   | 0.611 | 0.389 | 0.971              | 0.3   | 0.0      |
| Fl      | RAN        | day1 | 0.6  | 58.5  | 0.4    | 10.5   | 0.649 | 0.351 | 0.982              |       | 0.0      |
| Fl      | Krytox     | day0 | 2.1  | 73.8  | 0.9    | 7.4    | 0.614 | 0.386 | 0.986              | 0.5   | 0.0      |
| Fl      | Krytox     | day1 | 6.7  | 36.2  | 3.9    | 18.9   | 0.437 | 0.563 | 0.841              |       | 11.7     |
| Fl      | NP         | day0 | 0.9  | 70.8  | 0.6    | 11.1   | 0.548 | 0.452 | 0.815              | 0.0   | 0.0      |
| Fl      | NP         | day1 | 0.8  | 82.7  | 0.5    | 9.3    | 0.820 | 0.180 | 0.993              |       | 0.0      |
| Cy5     | RAN        | day0 | 1.3  | 57.4  | 0.7    | 7.2    | 0.121 | 0.879 | 0.957              | 8.2   | 0.0      |
| Cy5     | RAN        | day1 | 0.8  | 54.8  | 0.5    | 17.5   | 0.639 | 0.361 | 0.989              |       | 0.1      |
| Cy5     | Krytox     | day0 | 1.8  | 45.6  | 0.7    | 15.9   | 0.210 | 0.790 | 0.789              | 0.6   | 0.2      |
| Cy5     | Krytox     | day1 | 0.9  | 42.7  | 0.4    | 16.1   | 0.775 | 0.225 | 0.990              |       | 0.1      |
| Cy5     | NP         | day0 | 1.5  | 76.7  | 0.8    | 10.8   | 0.574 | 0.426 | 0.969              | 0.2   | 0.0      |
| Cy5     | NP         | day1 | 0.7  | 71.3  | 0.5    | 15.7   | 0.685 | 0.315 | 0.996              |       | 0.0      |
| DAPI    | RAN        | day0 | 32.5 | 82.0  | 6.7    | 16.1   | 0.998 | 0.002 | 0.829              | 7.2   | 2.7      |
| DAPI    | RAN        | day1 | 9.2  | 100.0 | 3.0    | 0.3    | 0.999 | 0.001 | 0.681              |       | 0.0      |
| DAPI    | Krytox     | day0 | 53.3 | 76.6  | 10.1   | 7.1    | 0.573 | 0.427 | 0.865              | 100.0 | 17.1     |
| DAPI    | Krytox     | day1 | 49.9 | 75.8  | 20.5   | 11.4   | 0.328 | 0.672 | 0.845              |       | 38.4     |
| DAPI    | NP         | day0 | 27.9 | 71.3  | 5.5    | 10.7   | 0.658 | 0.342 | 0.849              | 1.3   | 0.7      |
| DAPI    | NP         | day1 | 48.4 | 53.3  | 8.3    | 19.3   | 0.526 | 0.474 | 0.784              |       | 59.8     |
| AF350   | RAN        | day0 | 12.2 | 59.1  | 1.1    | 18.3   | 0.513 | 0.487 | 0.946              | 4.5   | 0.7      |
| AF350   | RAN        | day1 | 11.6 | 45.4  | 1.8    | 25.2   | 0.731 | 0.269 | 0.977              |       | 6.9      |
| AF350   | Krytox     | day0 | 11.6 | 76.6  | 2.9    | 10.5   | 0.318 | 0.682 | 0.853              | 6.7   | 0.0      |
| AF350   | Krytox     | day1 | 11.1 | 73.1  | 2.5    | 9.7    | 0.614 | 0.386 | 0.895              |       | 0.0      |
| AF350   | NP         | day0 | 14.4 | 76.9  | 4.4    | 9.8    | 0.267 | 0.733 | 0.837              | 1.0   | 0.0      |
| AF350   | NP         | day1 | 11.3 | 77.9  | 2.4    | 9.9    | 0.666 | 0.334 | 0.966              |       | 0.0      |
| Pyr     | RAN        | day0 | 0.5  | 19.9  | 0.4    | 9.7    | 0.477 | 0.523 | 0.958              | 9.5   | 0.5      |
| Pyr     | RAN        | day1 | 0.3  | 20.7  | 0.3    | 10.5   | 0.562 | 0.438 | 0.976              |       | 0.3      |
| Pyr     | Krytox     | day0 | 1.1  | 51.6  | 0.4    | 8.8    | 0.267 | 0.733 | 0.963              | 0.0   | 0.0      |
| Pyr     | Krytox     | day1 | 6.6  | 72.4  | 3.2    | 11.5   | 0.568 | 0.432 | 0.908              |       | 0.0      |
| Pyr     | NP         | day0 | 1.2  | 63.2  | 0.6    | 8.2    | 0.691 | 0.309 | 0.970              | 2.2   | 0.0      |
| Pyr     | NP         | day1 | 1.5  | 67.8  | 0.6    | 9.6    | 0.571 | 0.429 | 0.996              |       | 0.0      |
| AF488   | RAN        | day0 | 0.8  | 33.1  | 0.4    | 11.8   | 0.365 | 0.635 | 0.935              | 0.6   | 0.1      |
| AF488   | RAN        | day1 | 0.6  | 44.1  | 0.4    | 9.5    | 0.564 | 0.436 | 0.983              |       | 0.0      |
| AF488   | Krytox     | day0 | 1.8  | 70.9  | 0.7    | 9.6    | 0.468 | 0.532 | 0.990              | 1.0   | 0.0      |
| AF488   | Krytox     | day1 | 2.0  | 66.4  | 0.8    | 8.5    | 0.708 | 0.292 | 0.997              |       | 0.0      |
| AF488   | NP         | day0 | 2.3  | 63.5  | 1.7    | 11.9   | 0.578 | 0.422 | 0.642              | 2.3   | 0.0      |
| AF488   | NP         | day1 | 1.5  | 48.2  | 0.9    | 11.6   | 0.370 | 0.630 | 0.935              |       | 0.0      |
| AF568   | RAN        | day0 | 1.4  | 66.4  | 0.5    | 15.7   | 0.375 | 0.625 | 0.960              | 0.0   | 0.0      |
| AF568   | RAN        | day1 | 0.8  | 46.2  | 0.5    | 16.9   | 0.693 | 0.307 | 0.976              |       | 0.1      |
| AF568   | Krytox     | day0 | 1.5  | 78.0  | 0.6    | 10.5   | 0.526 | 0.474 | 0.992              | 0.1   | 0.0      |
| AF568   | Krytox     | day1 | 0.9  | 65.0  | 0.5    | 9.5    | 0.693 | 0.307 | 0.985              |       | 0.0      |
| AF568   | NP         | day0 | 0.6  | 77.9  | 0.5    | 13.8   | 0.703 | 0.297 | 0.998              | 0.0   | 0.0      |
| AF568   | NP         | day1 | 0.9  | 74.5  | 0.5    | 19.7   | 0.757 | 0.243 | 0.989              |       | 0.0      |

Table S5: Data calculated for the determination of the leakage categories for samples made with MiliQ.

| Dye      | Stabiliser | Day  | mu1  | mu2  | sigma1 | sigma2 | p1    | p2    | R <sup>2</sup> _bi | %dark | %overlap |
|----------|------------|------|------|------|--------|--------|-------|-------|--------------------|-------|----------|
| Rhod6G   | RAN        | day0 | 18.9 | 58.3 | 9.4    | 15.1   | 0.287 | 0.713 | 0.667              | 100.0 | 10.4     |
| Rhod6G   | RAN        | day1 | 14.7 | 58.6 | 5.0    | 31.4   | 0.997 | 0.003 | 0.965              |       | 12.8     |
| Rhod6G   | Krytox     | day0 | 49.3 | 68.2 | 17.0   | 9.4    | 0.478 | 0.522 | 0.914              | 99.9  | 44.3     |
| Rhod6G   | Krytox     | day1 | 48.1 | 66.7 | 16.6   | 7.2    | 0.564 | 0.436 | 0.821              |       | 37.7     |
| Rhod6G   | NP         | day0 | 38.4 | 62.7 | 14.9   | 11.3   | 0.307 | 0.693 | 0.839              | 100.0 | 34.7     |
| Rhod6G   | NP         | day1 | 28.0 | 35.9 | 6.6    | 13.1   | 0.143 | 0.857 | 0.886              |       | 58.8     |
| NR       | RAN        | day0 | 13.0 | 32.2 | 4.7    | 20.2   | 0.944 | 0.056 | 0.879              | 93.4  | 27.0     |
| NR       | RAN        | day1 | 3.0  | 100  | 1.2    | 0.3    | 0.995 | 0.005 | 0.931              |       | 0.0      |
| NR       | Krytox     | day0 | 15.2 | 21.8 | 9.1    | 1.8    | 0.620 | 0.380 | 0.954              | 99.4  | 28.4     |
| NR       | NP         | day1 | 6.7  | 31.3 | 3.3    | 27.6   | 0.984 | 0.016 | 0.919              |       | 14.1     |
| NR       | NP         | day0 | 3.8  | 100  | 1.7    | 0.3    | 0.996 | 0.004 | 0.872              | 99.4  | 0.0      |
| NR       | NP         | day1 | 2.9  | 74.5 | 1.1    | 30.4   | 0.974 | 0.026 | 0.960              |       | 0.5      |
| Rhod101  | RAN        | day0 | 7.4  | 73.6 | 3.5    | 9.8    | 0.633 | 0.367 | 0.935              | 0.0   | 0.0      |
| Rhod101  | RAN        | day1 | 12.0 | 36.7 | 5.4    | 15.3   | 0.259 | 0.741 | 0.849              |       | 18.9     |
| Rhod101  | Krytox     | day0 | 47.5 | 70.1 | 17.2   | 4.7    | 0.489 | 0.511 | 0.886              | 100.0 | 22.4     |
| Rhod101  | Krytox     | day1 | 31.6 | 41.5 | 14.0   | 14.7   | 0.577 | 0.423 | 0.778              |       | 72.6     |
| Rhod101  | NP         | day0 | 25.3 | 51.2 | 10.5   | 15.3   | 0.466 | 0.534 | 0.547              | 100.0 | 30.8     |
| Rhod101  | NP         | day1 | 30.6 | 50.1 | 16.6   | 16.0   | 0.442 | 0.558 | 0.658              |       | 54.7     |
| RhodB    | RAN        | day0 | 17.4 | 34.9 | 7.7    | 12.9   | 0.457 | 0.543 | 0.852              | 0.0   | 37.3     |
| RhodB    | RAN        | day1 | 28.6 | 33.2 | 24.3   | 4.4    | 0.131 | 0.869 | 0.947              |       | 32.0     |
| RhodB    | Krytox     | day0 | 29.3 | 39.6 | 14.4   | 6.3    | 0.560 | 0.440 | 0.927              | 100.0 | 50.5     |
| RhodB    | Krytox     | day1 | 2.9  | 26.1 | 2.1    | 17.0   | 0.320 | 0.680 | 0.743              |       | 8.1      |
| RhodB    | NP         | day0 | 40.6 | 54.6 | 16.2   | 5.6    | 0.888 | 0.112 | 0.778              | 100.0 | 39.5     |
| RhodB    | NP         | day1 | 31.8 | 93.7 | 13.8   | 6.6    | 0.989 | 0.011 | 0.779              |       | 0.2      |
| EMA      | RAN        | day0 | 1.2  | 53.2 | 0.5    | 14.5   | 0.478 | 0.522 | 0.977              | 0.0   | 0.0      |
| EMA      | RAN        | day1 | 0.6  | 38.6 | 0.4    | 6.7    | 0.541 | 0.459 | 0.982              |       | 0.0      |
| EMA      | Krytox     | day0 | 1.0  | 66.5 | 0.6    | 8.9    | 0.538 | 0.462 | 0.979              | 0.0   | 0.0      |
| EMA      | Krytox     | day1 | 4.3  | 65.4 | 1.5    | 12.3   | 0.760 | 0.240 | 0.935              |       | 0.0      |
| EMA      | NP         | day0 | 1.1  | 58.3 | 0.7    | 22.2   | 0.718 | 0.282 | 0.986              | 2.0   | 0.2      |
| EMA      | NP         | day1 | 2.5  | 100  | 0.6    | 0.3    | 0.999 | 0.001 | 0.985              |       | 0.6      |
| Cy7      | RAN        | day0 | 31.7 | 68.6 | 20.5   | 8.0    | 0.652 | 0.348 | 0.296              | 5.0   | 17.2     |
| Cy7      | RAN        | day1 | 6.1  | 59.9 | 1.6    | 15.3   | 0.654 | 0.346 | 0.956              |       | 0.1      |
| Cy7      | Krytox     | day0 | 8.0  | 58.9 | 2.7    | 19.5   | 0.337 | 0.663 | 0.660              | 7.9   | 1.4      |
| Cy7      | Krytox     | day1 | 6.4  | 46.3 | 2.6    | 16.9   | 0.695 | 0.305 | 0.948              |       | 2.5      |
| Cy7      | NP         | day0 | 31.7 | 66.4 | 17.1   | 10.9   | 0.546 | 0.454 | 0.495              | 1.5   | 20.9     |
| Cy7      | NP         | day1 | 3.6  | 63.6 | 1.8    | 22.7   | 0.613 | 0.387 | 0.908              |       | 0.6      |
| Res      | RAN        | day0 | 7.8  | 28.8 | 6.2    | 17.4   | 0.944 | 0.056 | 0.263              | 0.0   | 26.2     |
| Res      | RAN        | day1 | 14.9 | 32.1 | 8.6    | 15.9   | 0.805 | 0.195 | 0.859              |       | 42.1     |
| Res      | Krytox     | day0 | 5.7  | 46.5 | 5.3    | 29.5   | 0.831 | 0.169 | 0.199              | 0.0   | 11.4     |
| Res      | Krytox     | day1 | 2.2  | 24.8 | 1.1    | 20.2   | 0.825 | 0.175 | 0.994              |       | 4.8      |
| Res      | NP         | day0 | 0.5  | 27.8 | 0.4    | 20.1   | 0.829 | 0.171 | 0.999              | 0.8   | 0.7      |
| Res      | NP         | day1 | 9.7  | 24.6 | 0.5    | 19.5   | 0.793 | 0.207 | 0.989              |       | 1.4      |
| AZ       | RAN        | day0 | 5.4  | 32.1 | 4.3    | 20.7   | 0.856 | 0.144 | 0.375              | 0.0   | 14.7     |
| AZ       | RAN        | day1 | 0.9  | 11.9 | 1.0    | 14.6   | 0.925 | 0.075 | 0.690              |       | 5.8      |
| AZ       | Krytox     | day0 | 16.6 | 69.5 | 11.4   | 8.5    | 0.976 | 0.021 | 0.921              | 0.0   | 7.4      |
| AZ       | Krytox     | day1 | 1.0  | 100  | 1.6    | 0.3    | 0.999 | 0.001 | 0.615              |       | 0.0      |
| AZ       | NP         | day0 | 0.2  | 6.4  | 0.3    | 14.2   | 0.862 | 0.138 | 0.958              | 0.8   | 0.7      |
| AZ       | NP         | day1 | 0.3  | 11.1 | 0.4    | 20.7   | 0.888 | 0.112 | 0.992              |       | 0.9      |
| SulfRhod | RAN        | day0 | 0.6  | 58.3 | 0.5    | 27.8   | 0.769 | 0.231 | 0.994              | 0.1   | 0.2      |
| SulfRhod | RAN        | day1 | 0.5  | 57.6 | 0.4    | 24.9   | 0.805 | 0.195 | 0.996              |       | 0.2      |
| SulfRhod | Krytox     | day0 | 0.5  | 41.5 | 0.4    | 7.0    | 0.287 | 0.713 | 0.971              | 3.1   | 0.0      |
| SulfRhod | Krytox     | day1 | 2.4  | 59.5 | 0.9    | 11.7   | 0.639 | 0.361 | 0.976              |       | 0.0      |
| SulfRhod | NP         | day0 | 2.6  | 61.6 | 1.0    | 12.2   | 0.246 | 0.754 | 0.895              | 2.1   | 0.0      |
| SulfRhod | NP         | day1 | 1.3  | 71.2 | 0.8    | 10.0   | 0.462 | 0.538 | 0.960              |       | 0.0      |
| F1       | RAN        | day0 | 0.3  | 41.2 | 0.4    | 12.5   | 0.809 | 0.191 | 0.992              | 8.4   | 0.0      |
| F1       | RAN        | day1 | 0.7  | 46.3 | 0.6    | 13.8   | 0.701 | 0.299 | 0.941              |       | 0.0      |
| F1       | Krytox     | day0 | 0.5  | 55.1 | 0.4    | 13.8   | 0.573 | 0.427 | 0.905              | 2.1   | 0.0      |
| F1       | Krytox     | day1 | 0.9  | 22.9 | 0.6    | 16.7   | 0.238 | 0.762 | 0.830              |       | 2.1      |
| F1       | NP         | day0 | 1.6  | 72.7 | 0.7    | 8.6    | 0.625 | 0.375 | 0.993              | 1.1   | 0.0      |
| F1       | NP         | day1 | 0.3  | 79.7 | 0.4    | 9.0    | 0.957 | 0.043 | 0.993              |       | 0.0      |
| Cy5      | RAN        | day0 | 26.2 | 32.3 | 20.2   | 5.1    | 0.365 | 0.635 | 0.688              | 0.2   | 40.9     |
| Cy5      | RAN        | day1 | 0.8  | 44.2 | 0.5    | 12.0   | 0.511 | 0.489 | 0.985              |       | 0.0      |
| Cy5      | Krytox     | day0 | 28.6 | 32.2 | 25.8   | 3.9    | 0.525 | 0.475 | 0.464              | 0.1   | 28.3     |
| Cy5      | Krytox     | day1 | 0.4  | 29.3 | 0.4    | 17.8   | 0.659 | 0.341 | 0.981              |       | 0.5      |
| Cy5      | NP         | day0 | 1.4  | 63.4 | 0.8    | 10.5   | 0.240 | 0.760 | 0.955              | 8.8   | 0.0      |
| Cy5      | NP         | day1 | 1.2  | 67.4 | 0.6    | 11.7   | 0.706 | 0.294 | 0.995              |       | 0.0      |
| DAPI     | RAN        | day0 | 25.8 | 67.5 | 7.0    | 10.0   | 0.285 | 0.715 | 0.849              | 6.4   | 1.4      |
| DAPI     | RAN        | day1 | 16.3 | 67.4 | 5.1    | 11.2   | 0.731 | 0.269 | 0.906              |       | 0.2      |
| DAPI     | Krytox     | day0 | 55.2 | 58.1 | 19.6   | 10.9   | 0.231 | 0.769 | 0.939              | 41.2  | 71.8     |
| DAPI     | Krytox     | day1 | 37.4 | 64.7 | 13.9   | 11.7   | 0.589 | 0.411 | 0.727              |       | 28.7     |
| DAPI     | NP         | day0 | 28.8 | 53.1 | 13.7   | 12.9   | 0.414 | 0.586 | 0.731              | 97.9  | 36.1     |
| DAPI     | NP         | day1 | 48.4 | 55.5 | 18.7   | 9.8    | 0.721 | 0.279 | 0.795              |       | 65.7     |
| AF350    | RAN        | day0 | 9.5  | 63.6 | 2.3    | 10.9   | 0.446 | 0.554 | 0.891              | 7.0   | 0.0      |
| AF350    | RAN        | day1 | 5.3  | 58.4 | 1.7    | 15.5   | 0.634 | 0.366 | 0.943              |       | 0.1      |
| AF350    | Krytox     | day0 | 12.9 | 61.4 | 2.1    | 13.6   | 0.336 | 0.664 | 0.760              | 3.9   | 0.1      |
| AF350    | Krytox     | day1 | 6.2  | 69.4 | 2.2    | 15.5   | 0.789 | 0.211 | 0.957              |       | 0.0      |
| AF350    | NP         | day0 | 11.8 | 71.0 | 3.7    | 12.3   | 0.369 | 0.631 | 0.802              | 9.6   | 0.0      |
| AF350    | NP         | day1 | 5.2  | 37.7 | 2.0    | 12.7   | 0.839 | 0.161 | 0.974              |       | 0.0      |
| Pvr      | RAN        | day0 | 1.1  | 63.3 | 0.5    | 11.7   | 0.444 | 0.556 | 0.974              | 2.3   | 0.0      |
| Pvr      | RAN        | day1 | 0.5  | 47.4 | 0.4    | 14.2   | 0.629 | 0.371 | 0.992              |       | 0.0      |
| Pvr      | Krytox     | day0 | 0.7  | 47.3 | 0.4    | 12.9   | 0.478 | 0.522 | 0.960              | 1.7   | 0.0      |
| Pvr      | Krytox     | day1 | 1.6  | 31.8 | 1.2    | 18.7   | 0.632 | 0.368 | 0.863              |       | 2.8      |
| Pvr      | NP         | day0 | 1.1  | 64.1 | 0.6    | 16.1   | 0.692 | 0.308 | 0.971              | 4.6   | 0.0      |
| Pvr      | NP         | day1 | 0.4  | 72.6 | 0.4    | 12.6   | 0.924 | 0.076 | 0.908              |       | 0.0      |
| AF488    | RAN        | day0 | 1.6  | 72.6 | 0.6    | 14.2   | 0.381 | 0.619 | 0.975              | 0.3   | 0.0      |
| AF488    | RAN        | day1 | 0.2  | 20.4 | 0.3    | 11.0   | 0.694 | 0.306 | 0.984              |       | 0.2      |
| AF488    | Krytox     | day0 | 1.8  | 59.3 | 0.7    | 18.2   | 0.344 | 0.656 | 0.988              | 4.4   | 0.1      |
| AF488    | Krytox     | day1 | 0.4  | 43.2 | 0.4    | 13.0   | 0.786 | 0.214 | 0.987              |       | 0.0      |
| AF488    | NP         | day0 | 0.8  | 67.4 | 0.5    | 22.8   | 0.867 | 0.133 | 0.993              | 4.8   | 0.0      |
| AF488    | NP         | day1 | 42.1 | 42.1 | 0.4    | 13.9   | 0.709 | 0.291 | 0.991              |       | 0.0      |
| AF568    | RAN        | day0 | 1.0  | 61.9 | 0.7    | 14.1   | 0.357 | 0.643 | 0.959              | 0.0   | 0.0      |
| AF568    | RAN        | day1 | 1.0  | 47.5 | 0.6    | 11.1   | 0.503 | 0.497 | 0.968              |       | 0.0      |
| AF568    | Krytox     | day0 | 2.2  | 51.2 | 0.8    | 8.0    | 0.327 | 0.673 | 0.908              | 0.9   | 0.0      |
| AF568    | Krytox     | day1 | 0.6  | 51.2 | 0.4    | 15.2   | 0.632 | 0.368 | 0.990              |       | 0.0      |
| AF568    | NP         | day0 | 2.9  | 79.9 | 0.8    | 8.6    | 0.153 | 0.847 | 0.914              | 0.4   | 0.0      |
| AF568    | NP         | day1 | 0.6  | 71.1 | 0.5    | 10.9   | 0.333 | 0.667 | 0.979              |       | 0.0      |
